# Supplementary material for: Successful Treatment of Severe Tungiasis in Pigs Using a Topical Aerosol Containing Chlorfenvinphos, Dichlorphos and Gentian Violet
Source: PLOS journal article supplement (doi:10.1371/journal.pntd.0005056), 2016-10-11

**S3 Fig: Flow Diagram showing recruitment and randomization of the pigs to the groups**

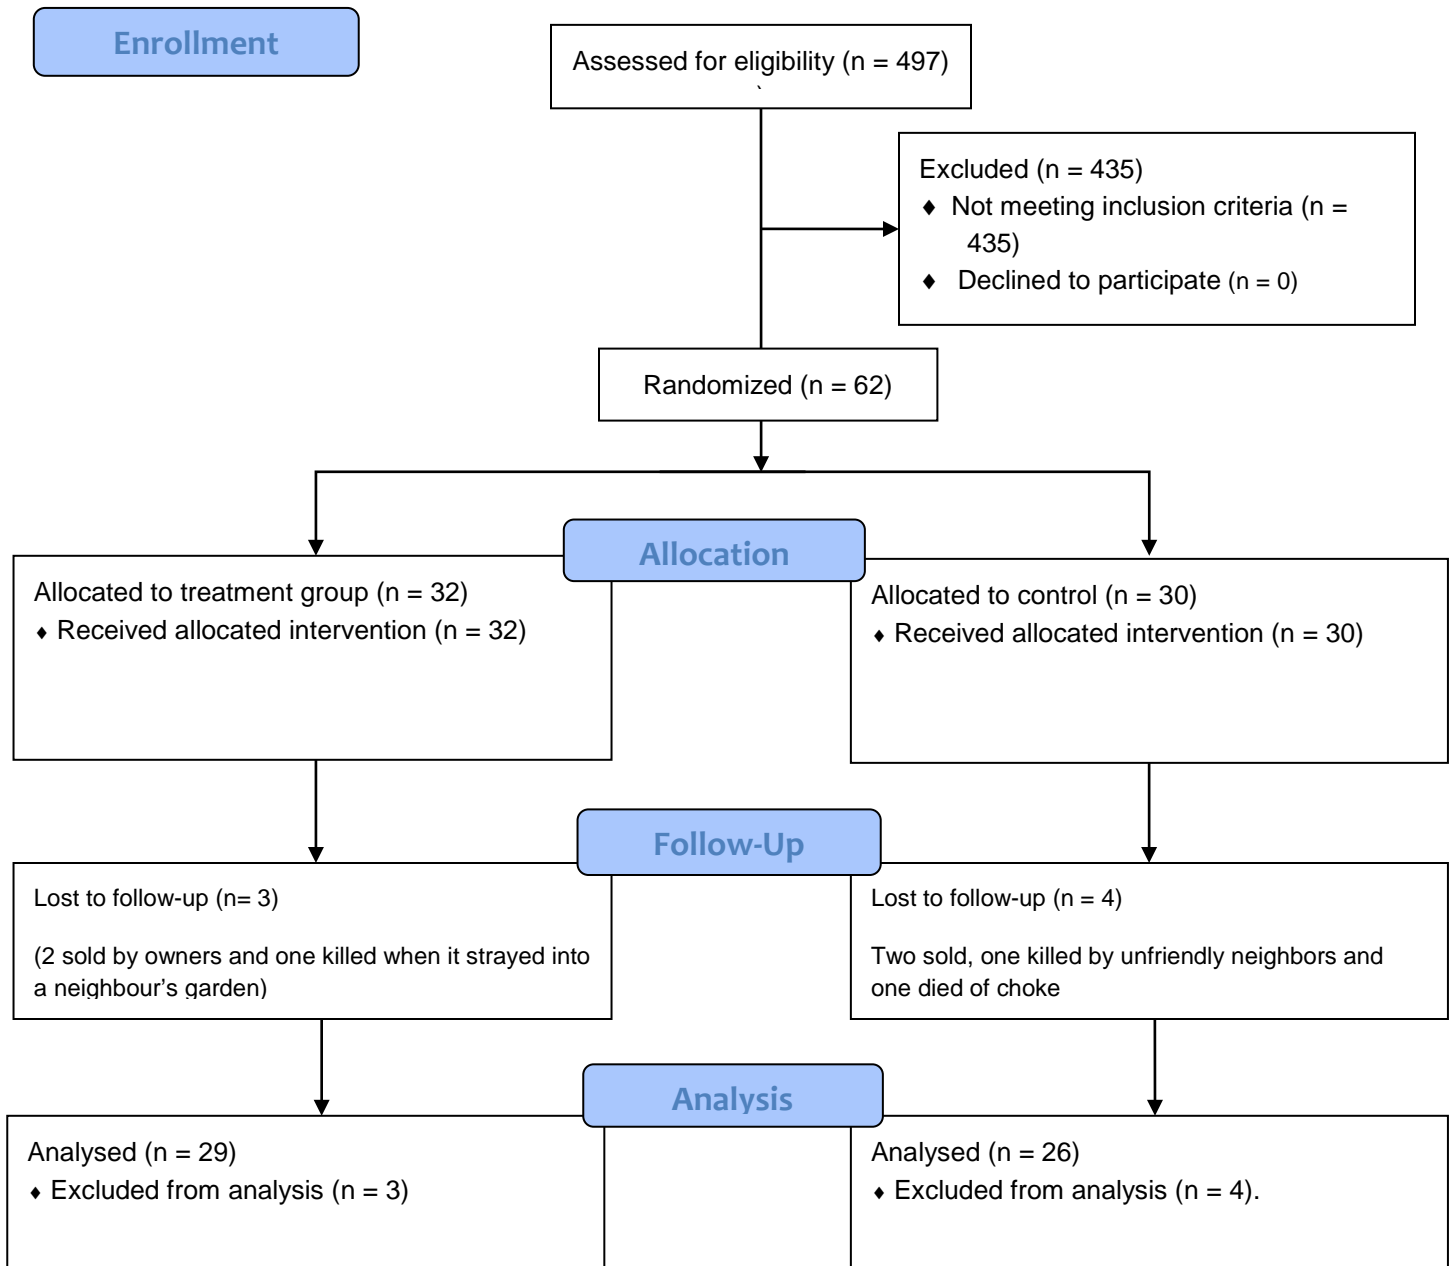

Supplement: S3 (10.1371/journal.pntd.0005056.s003) [file journal.pntd.0005056.s003]
